# Supplementary material
Source: MDPI journal article supplement (https://www.mdpi.com/2673-401X/2/4/25)

# **Supplementary Materials**

## **MICELLAR SUZUKI CROSS-COUPPLING BETWEEN THIOPHENE AND ANILINE IN WATER AND UNDER AIR**

Dawod Yousif <sup>1</sup>, Silvia Tombolato <sup>1</sup>, Elmehdi Ould Maina <sup>1</sup>, Riccardo Po <sup>2</sup>, Paolo Biagini <sup>2</sup>, Antonio Papagni <sup>1</sup> and Luca Vaghi <sup>1,\*</sup>

<sup>1</sup> Department of Materials Science, University of Milano-Bicocca, via R. Cozzi 55, 20125 Milano, Italy.

<sup>2</sup> Renewable Energy, Magnetic Fusion and Material Science Research Center, Istituto Donegani, Eni S.p.A., via Fauser 4, 28100 Novara, Italy.

### **Table of Contents**

**S2.** <sup>1</sup>H NMR and <sup>13</sup>C NMR of compound **3aa**

**S3.** <sup>1</sup>H NMR of compound **3ab**

**S4.** <sup>1</sup>H NMR and <sup>13</sup>C NMR of compound **3ba**

**S5.** <sup>1</sup>H NMR and <sup>13</sup>C NMR of compound **3bb**

**S6.** <sup>1</sup>H NMR of compounds **3ca** and **3cb**

**S7.** <sup>1</sup>H NMR and <sup>13</sup>C NMR of compound **7aa**

**S8.** <sup>1</sup>H NMR of compound **7ba**

**S9.** <sup>1</sup>H NMR and <sup>13</sup>C NMR of compound **7ca**

**S10.** <sup>1</sup>H NMR of compound **7da**

**S11.** <sup>1</sup>H NMR and <sup>13</sup>C NMR of compound **7ab**

**S12.** <sup>1</sup>H NMR and <sup>13</sup>C NMR of compound **7bb**

**S13.** <sup>1</sup>H NMR and <sup>13</sup>C NMR of compound **7cb**

**S14.** <sup>1</sup>H NMR and <sup>13</sup>C NMR of compound **7db**

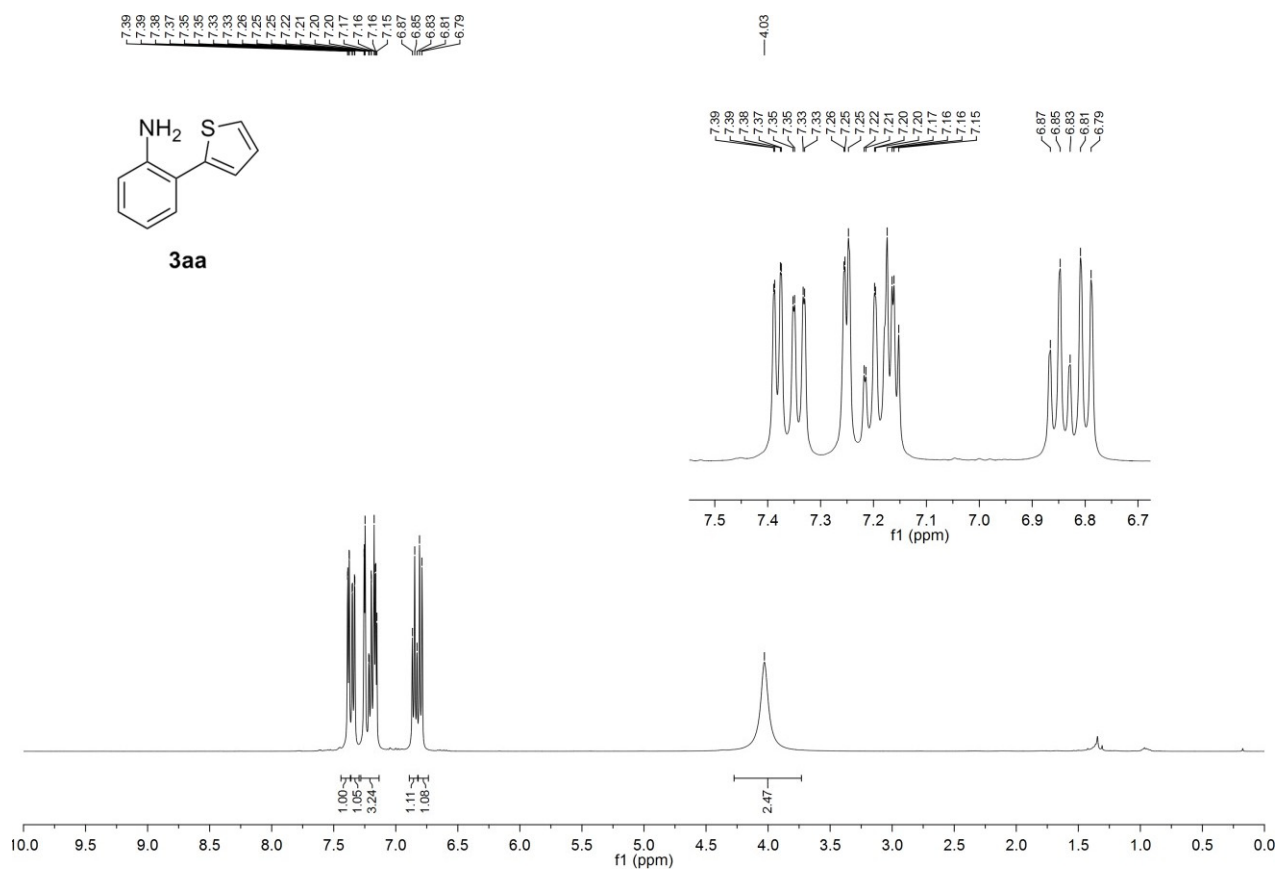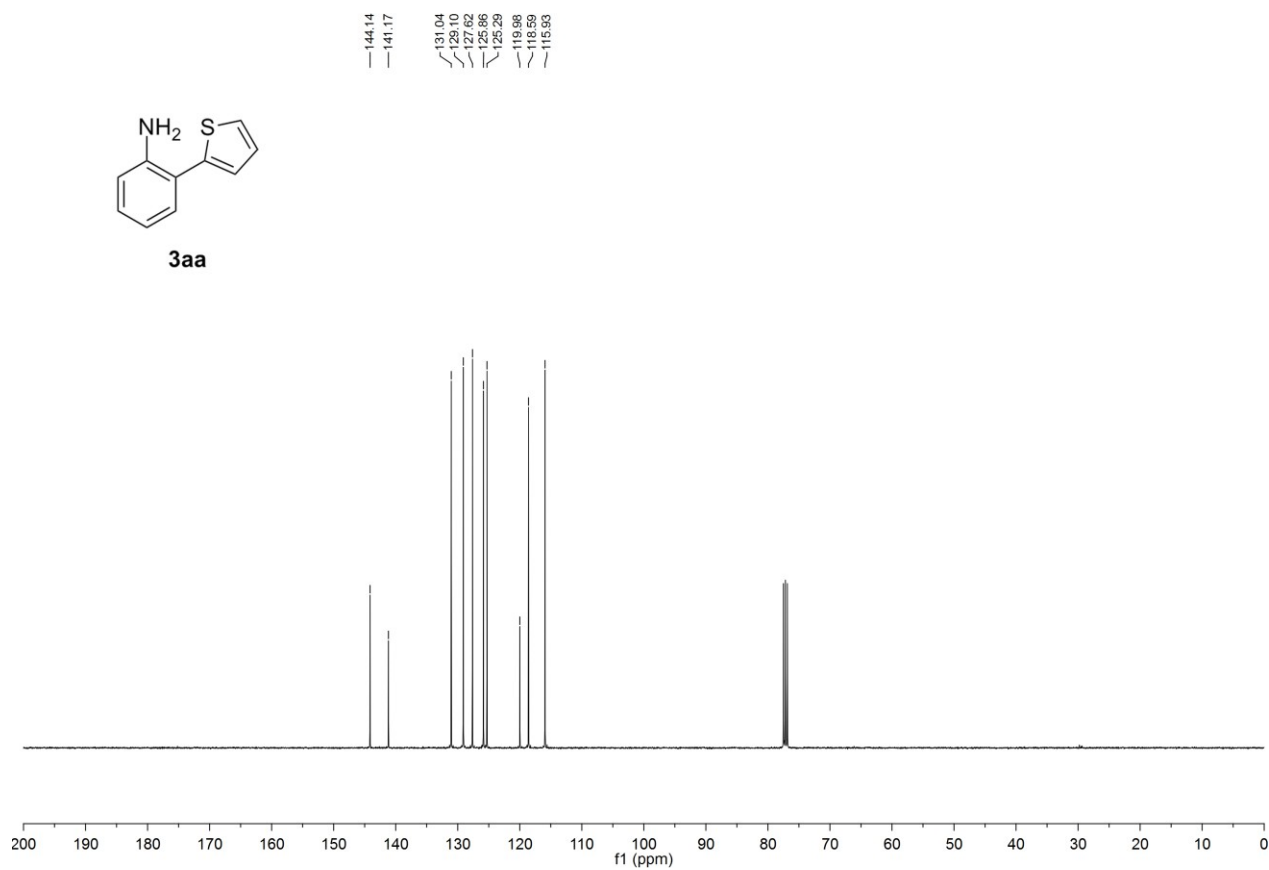

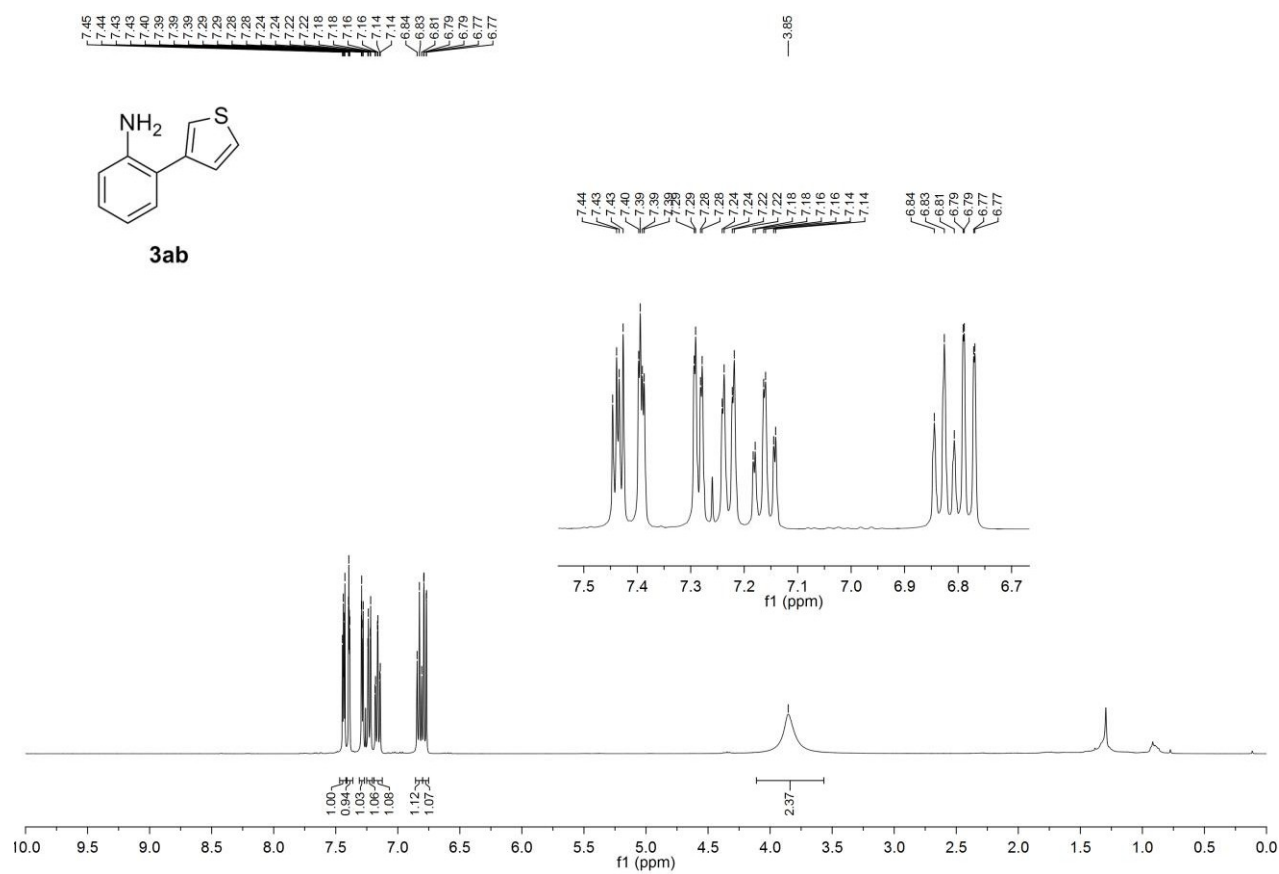

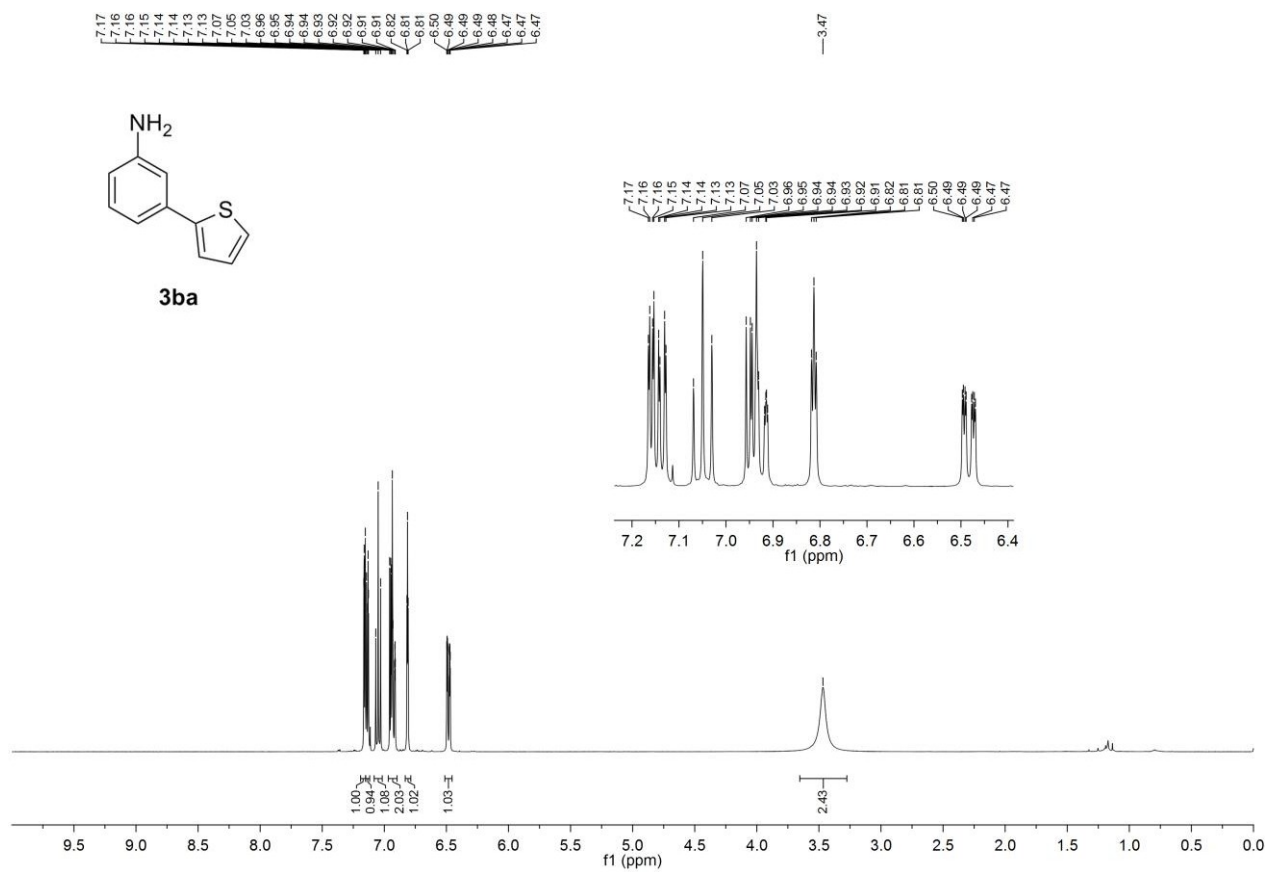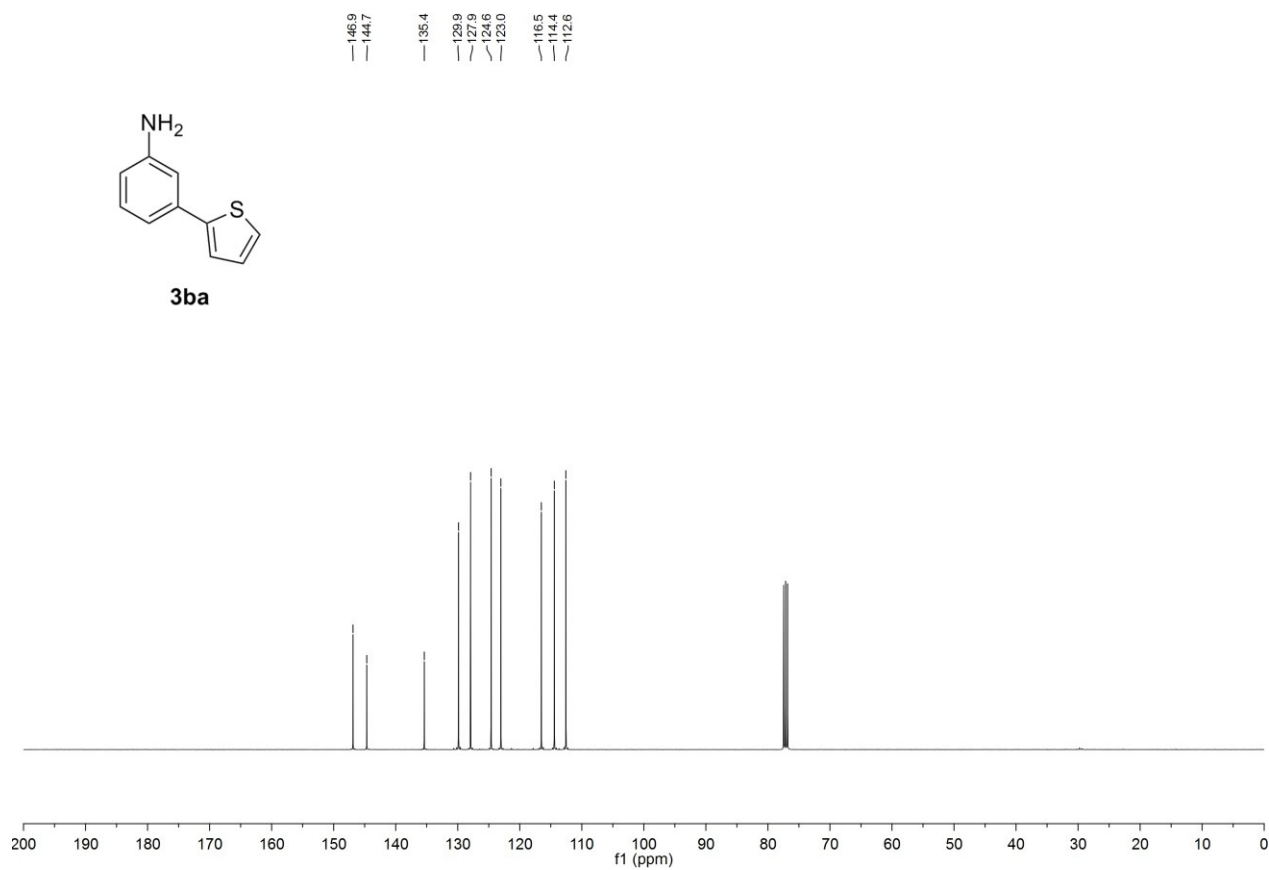

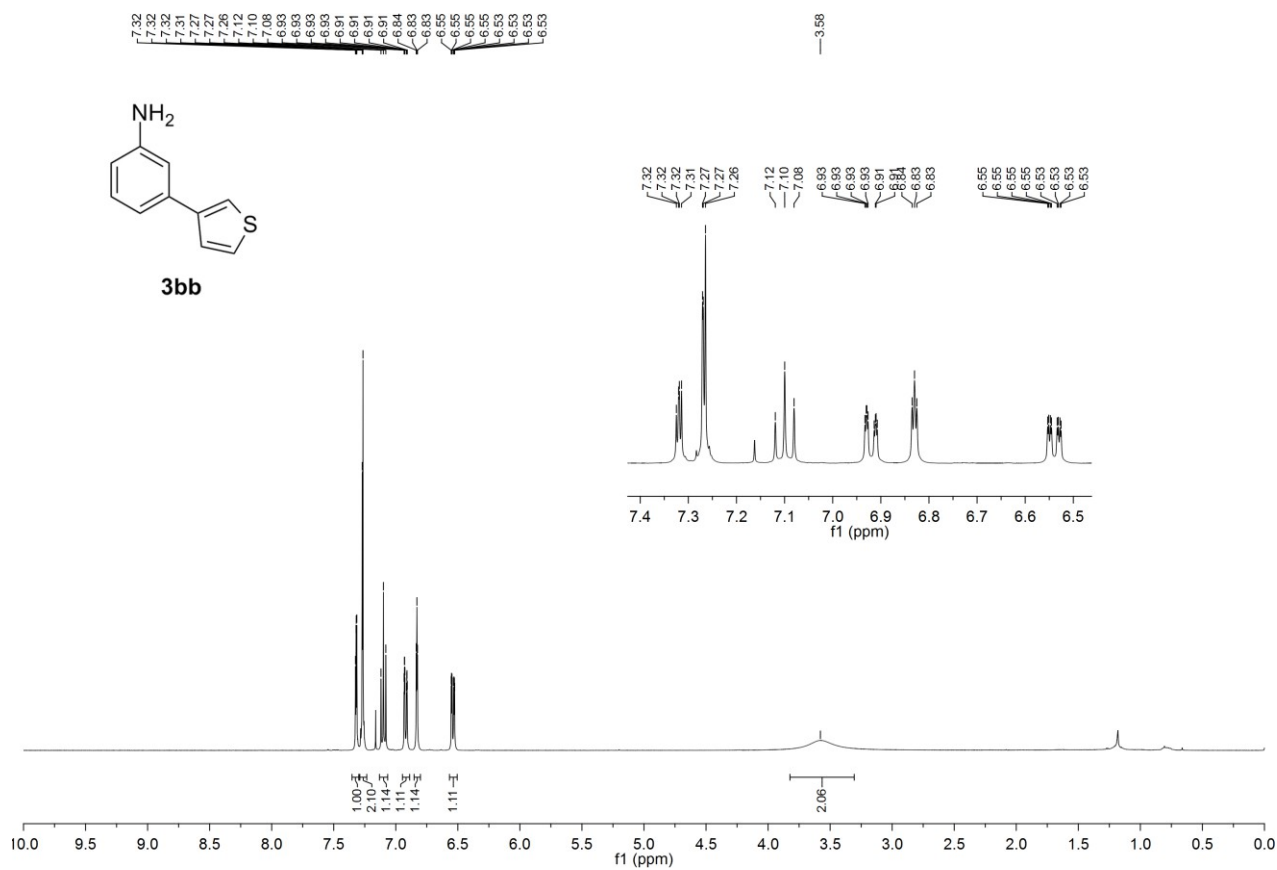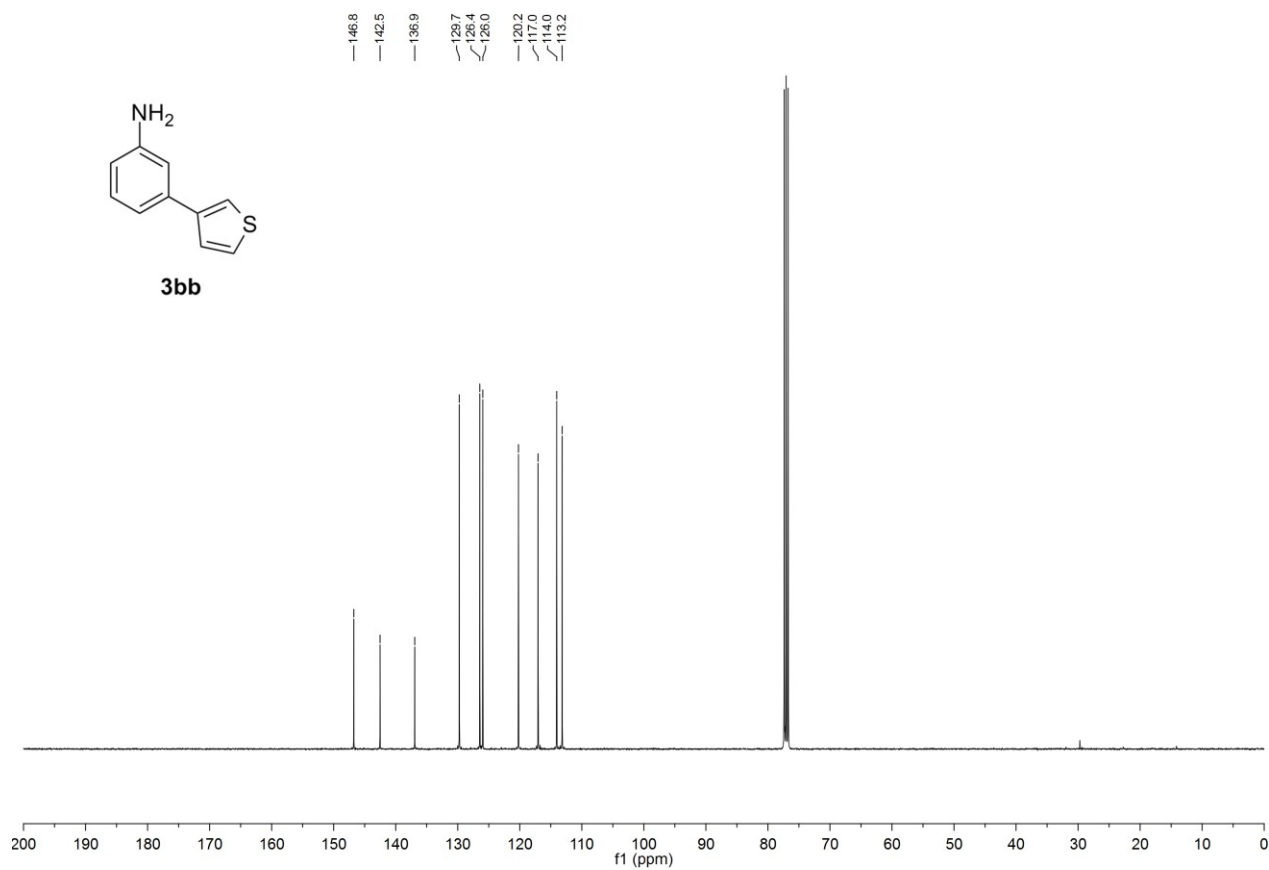

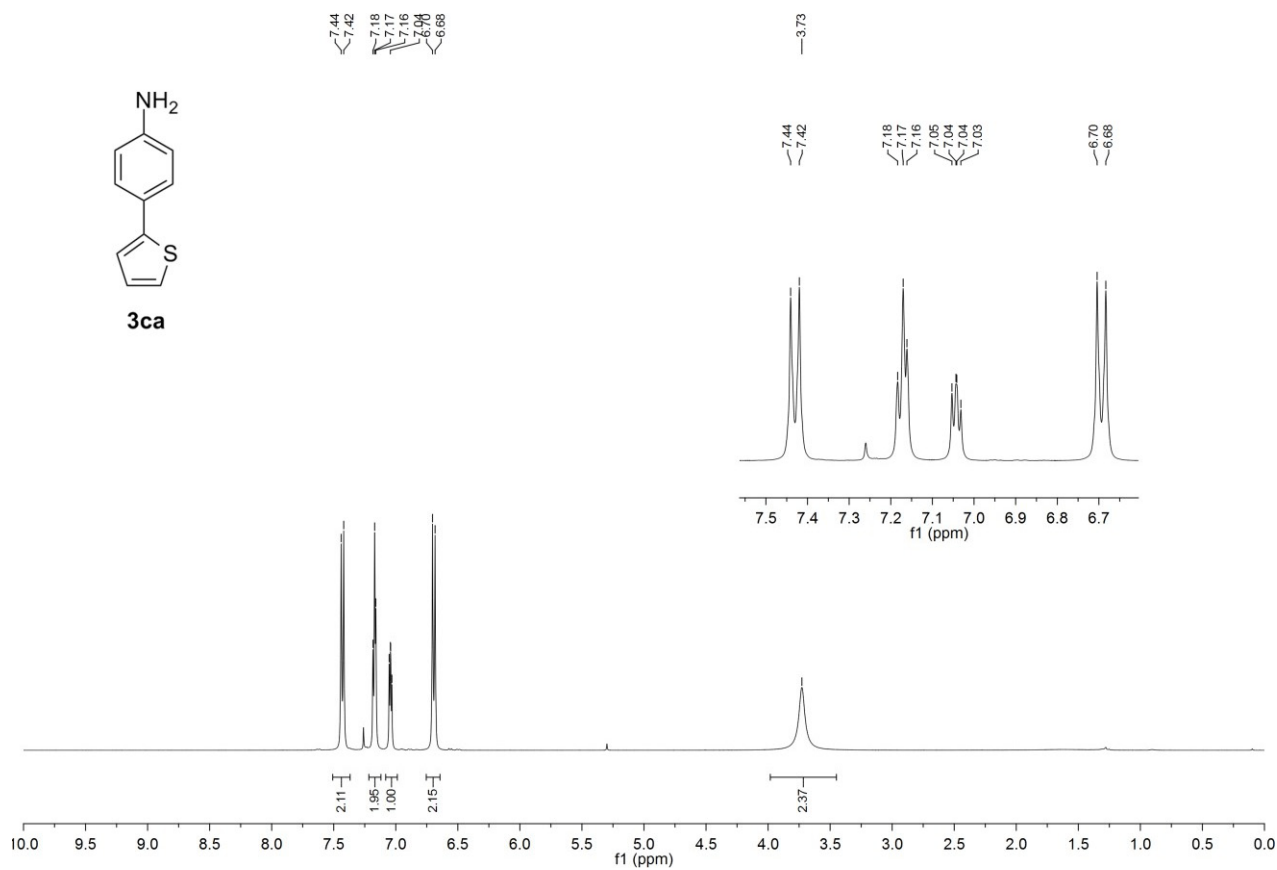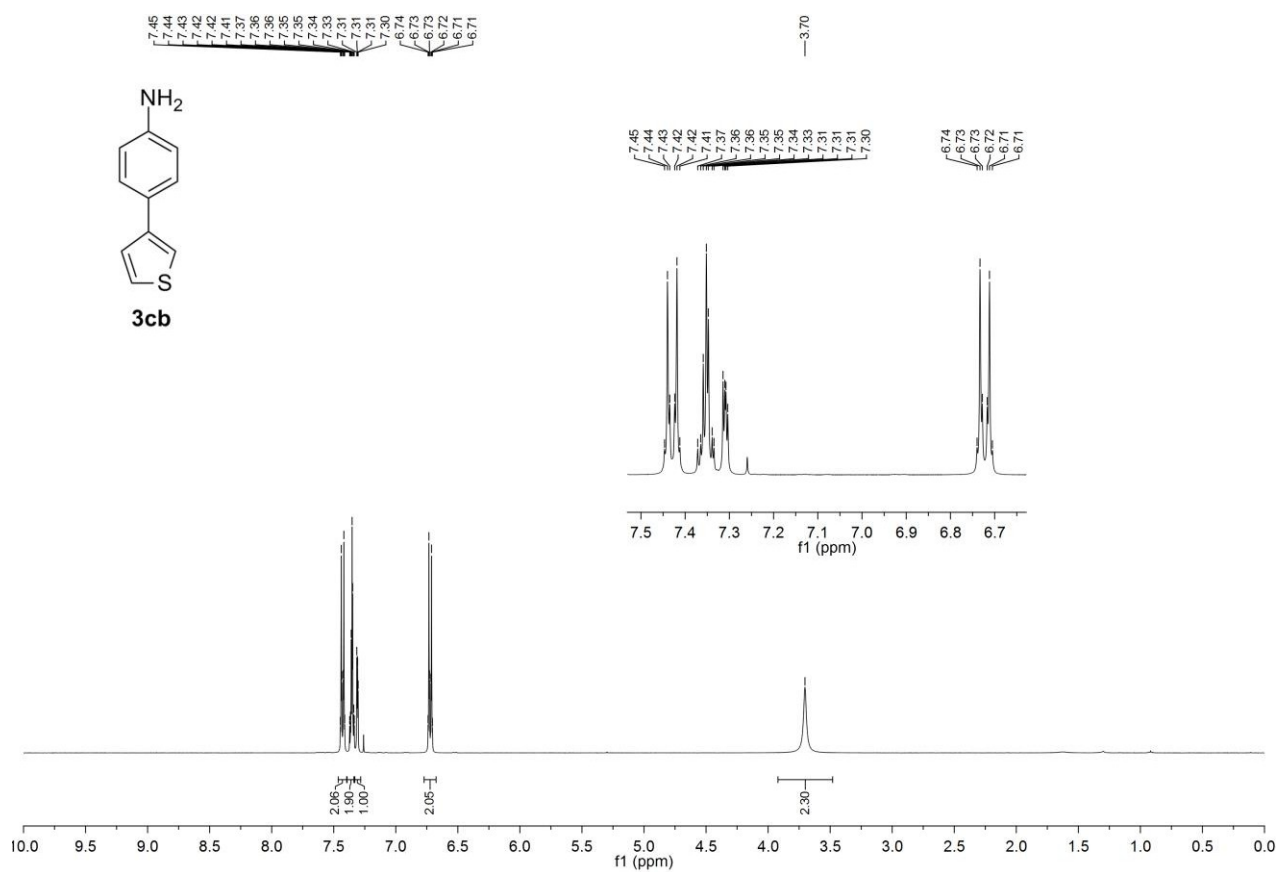

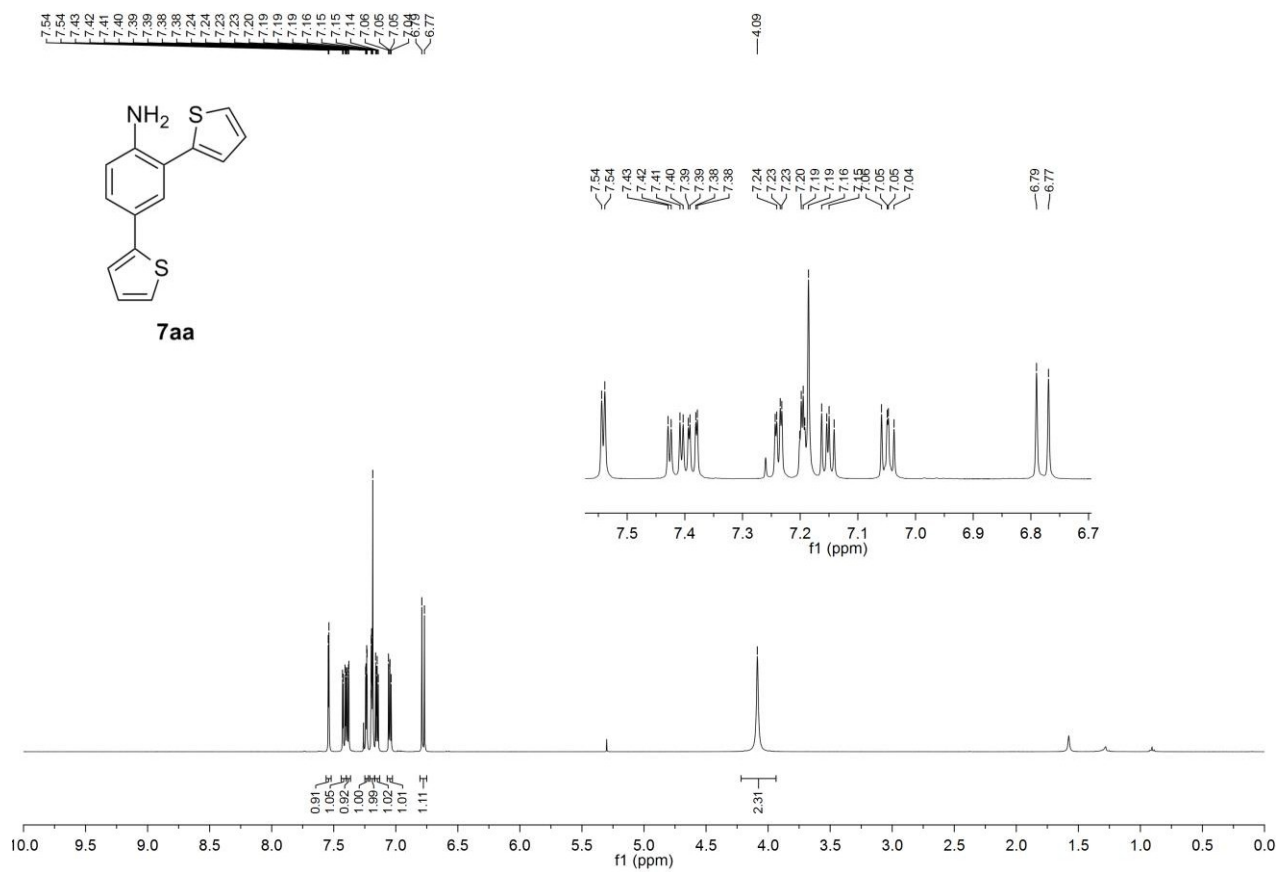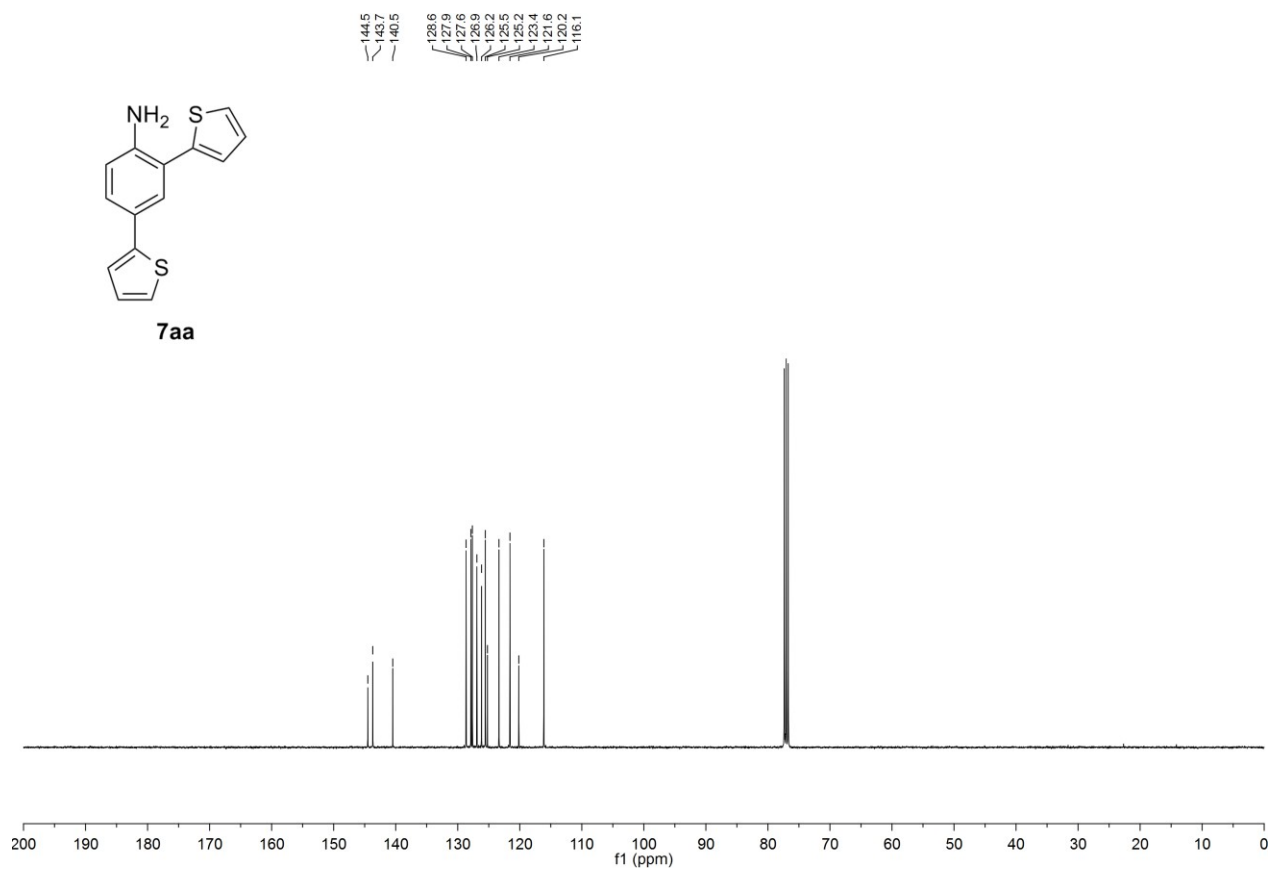

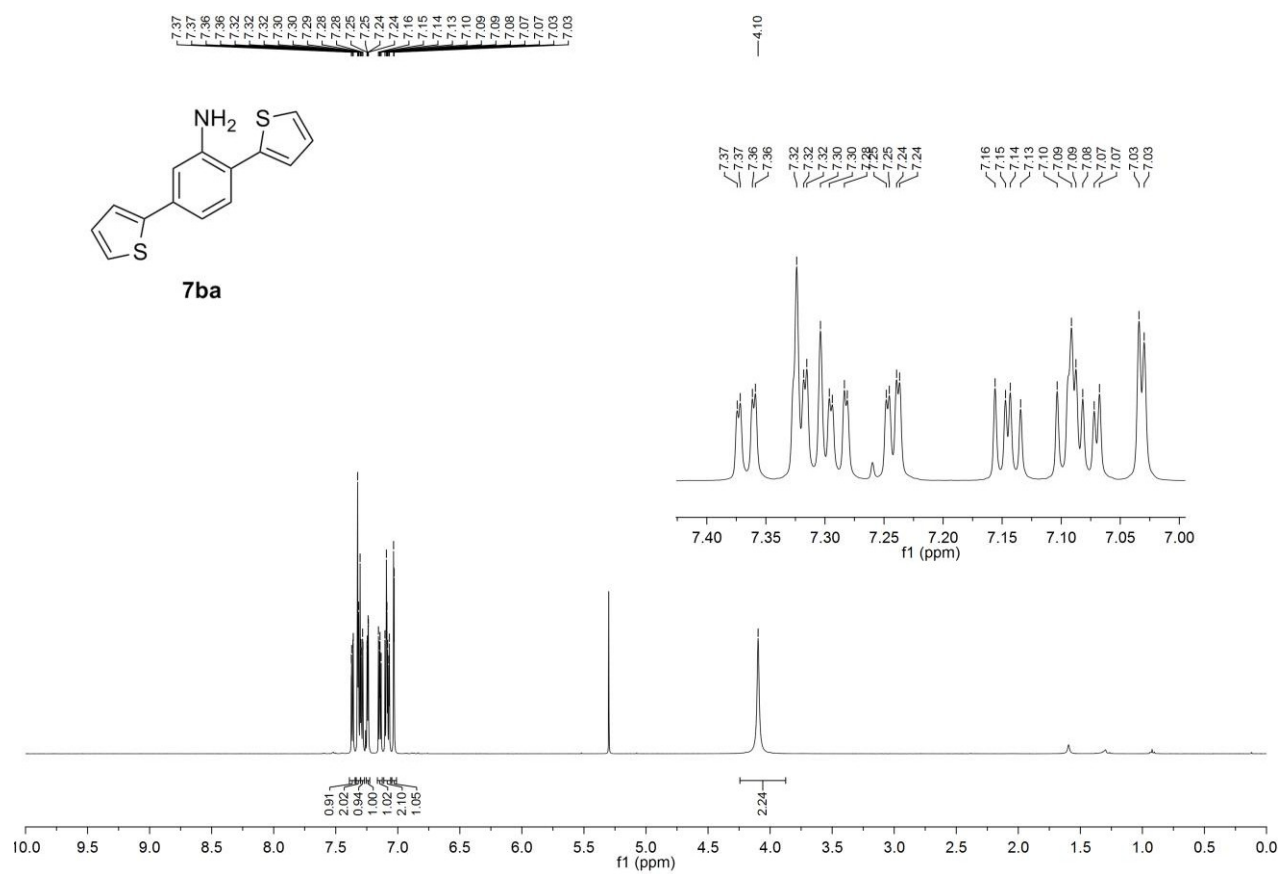



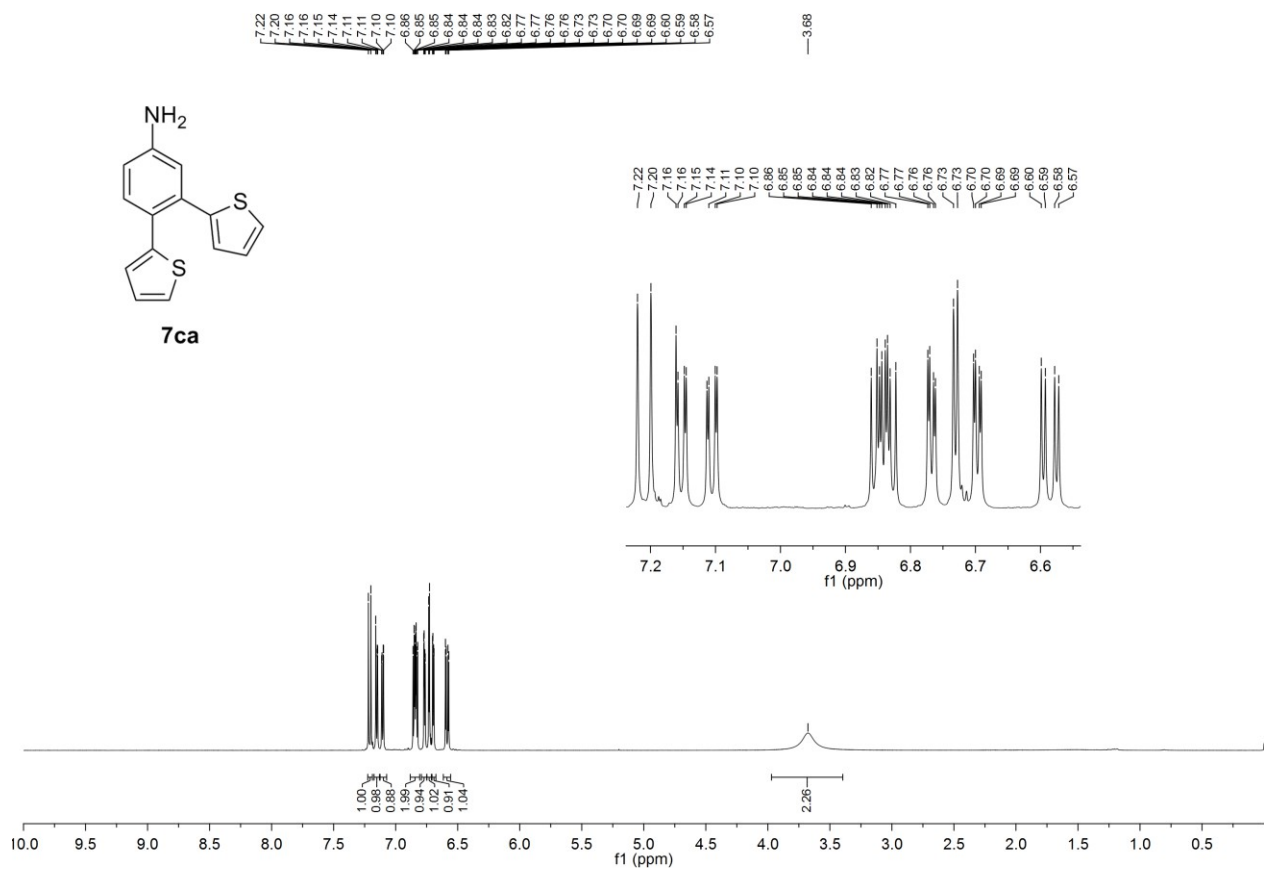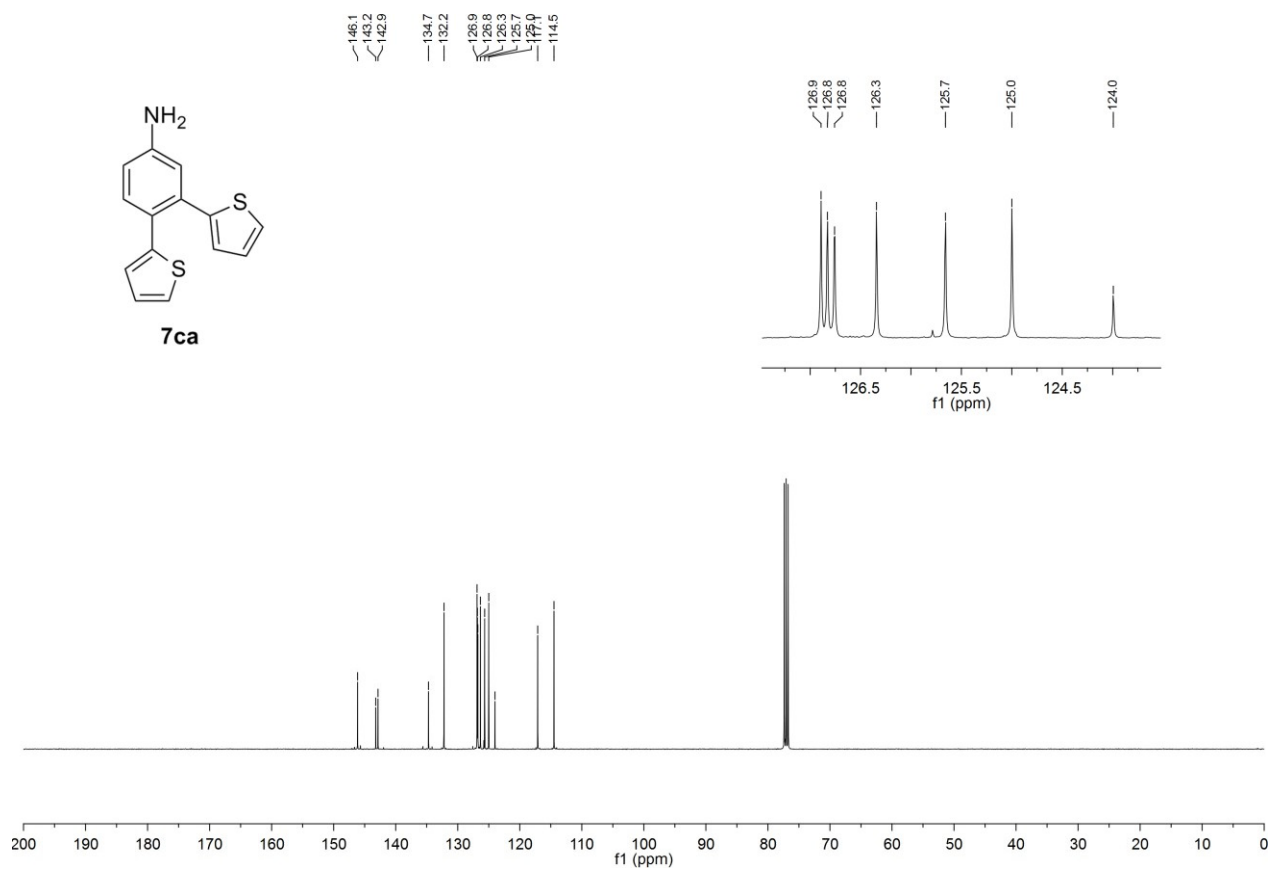

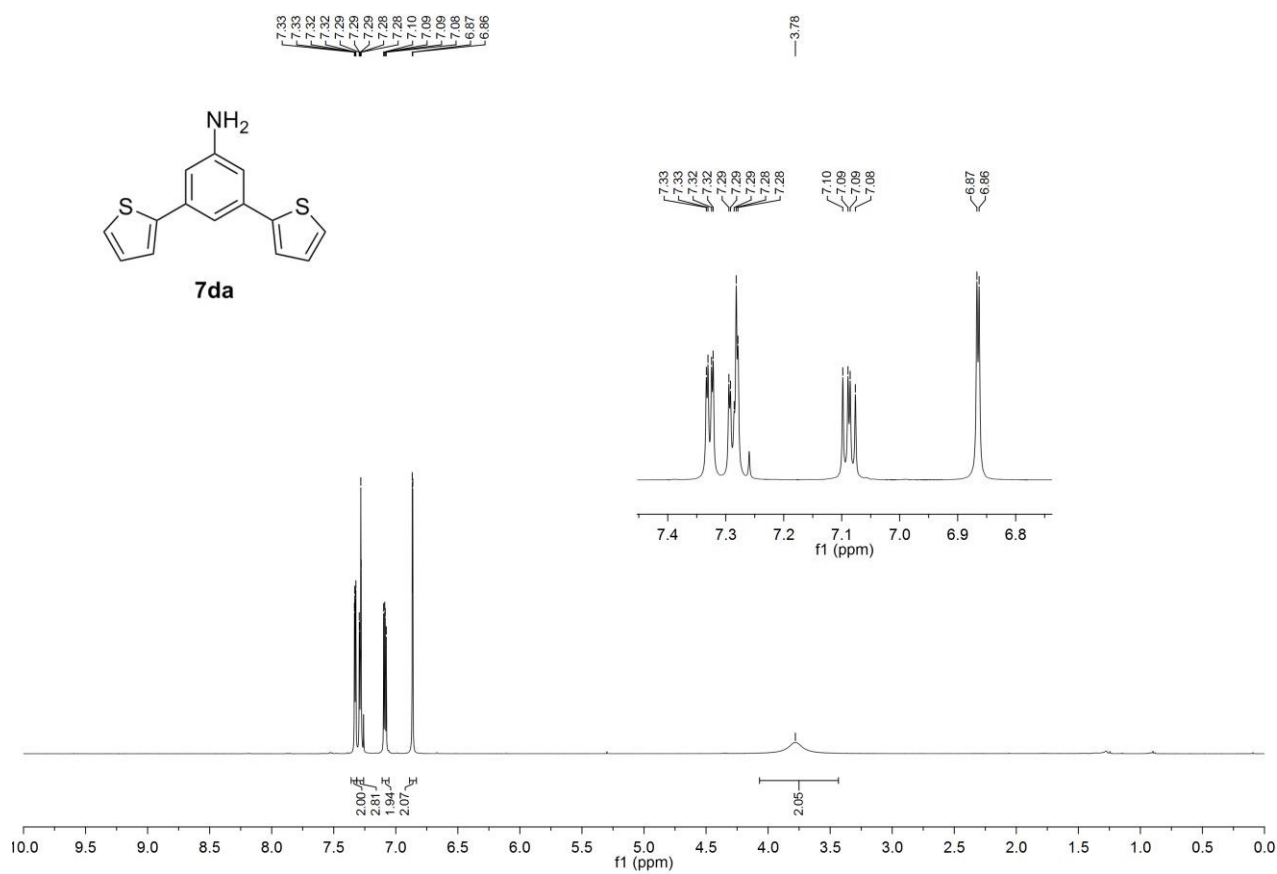

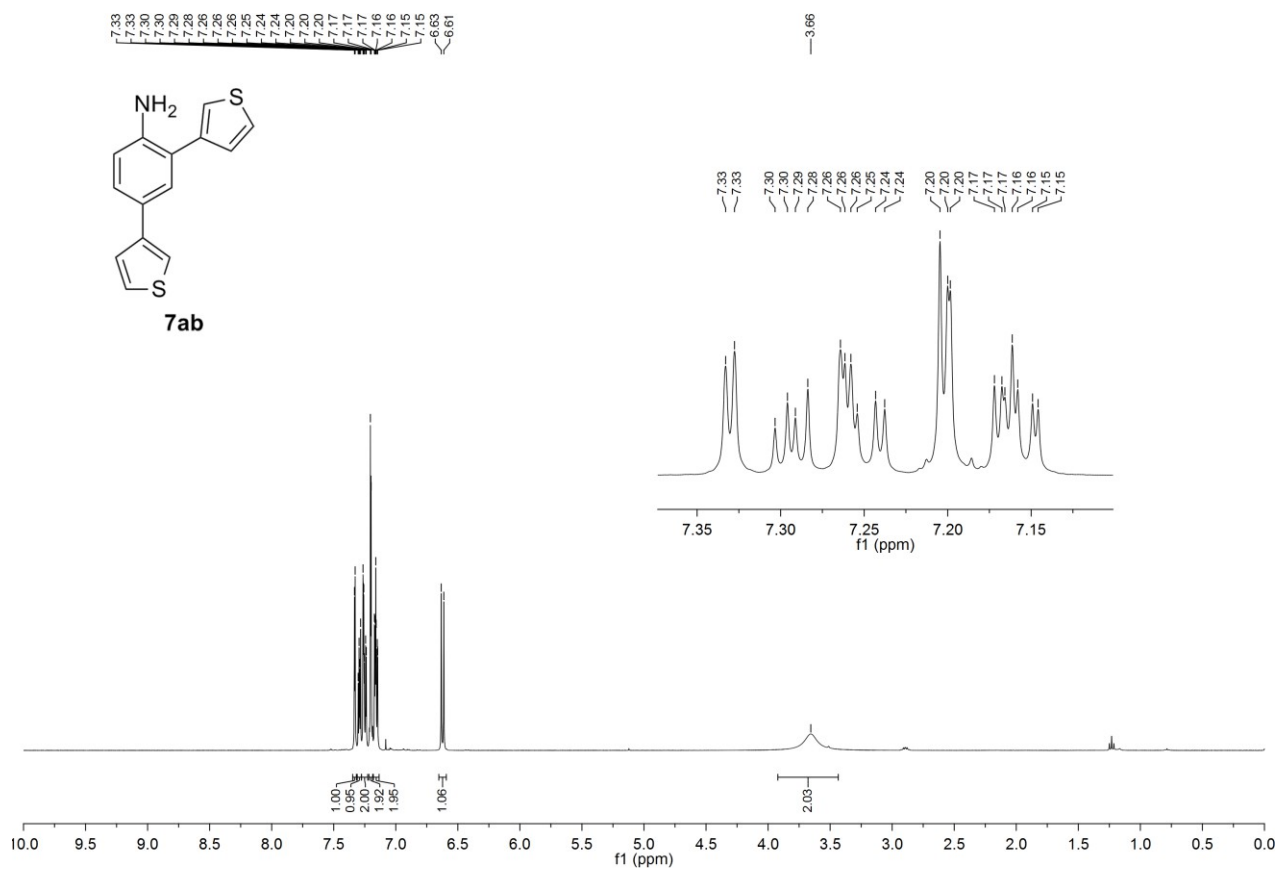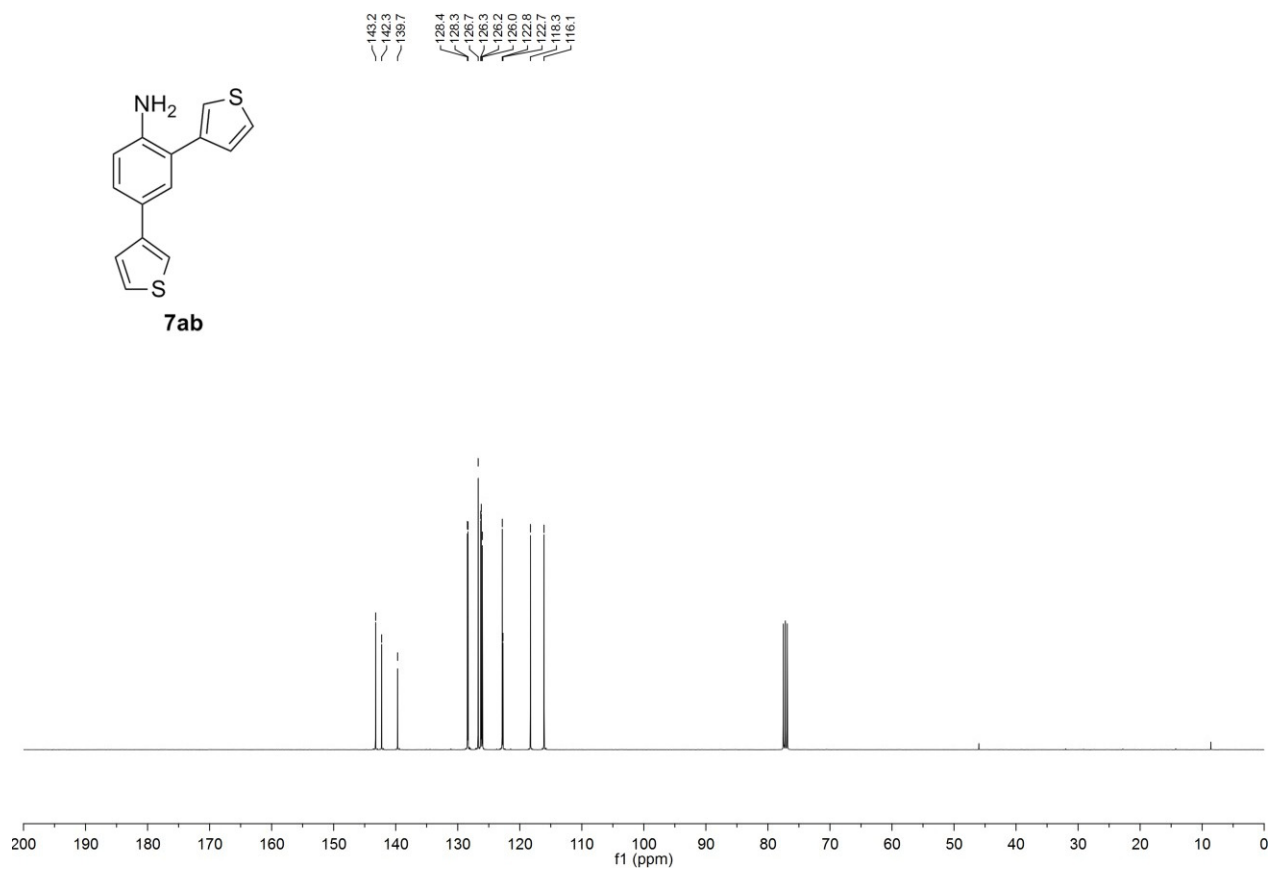

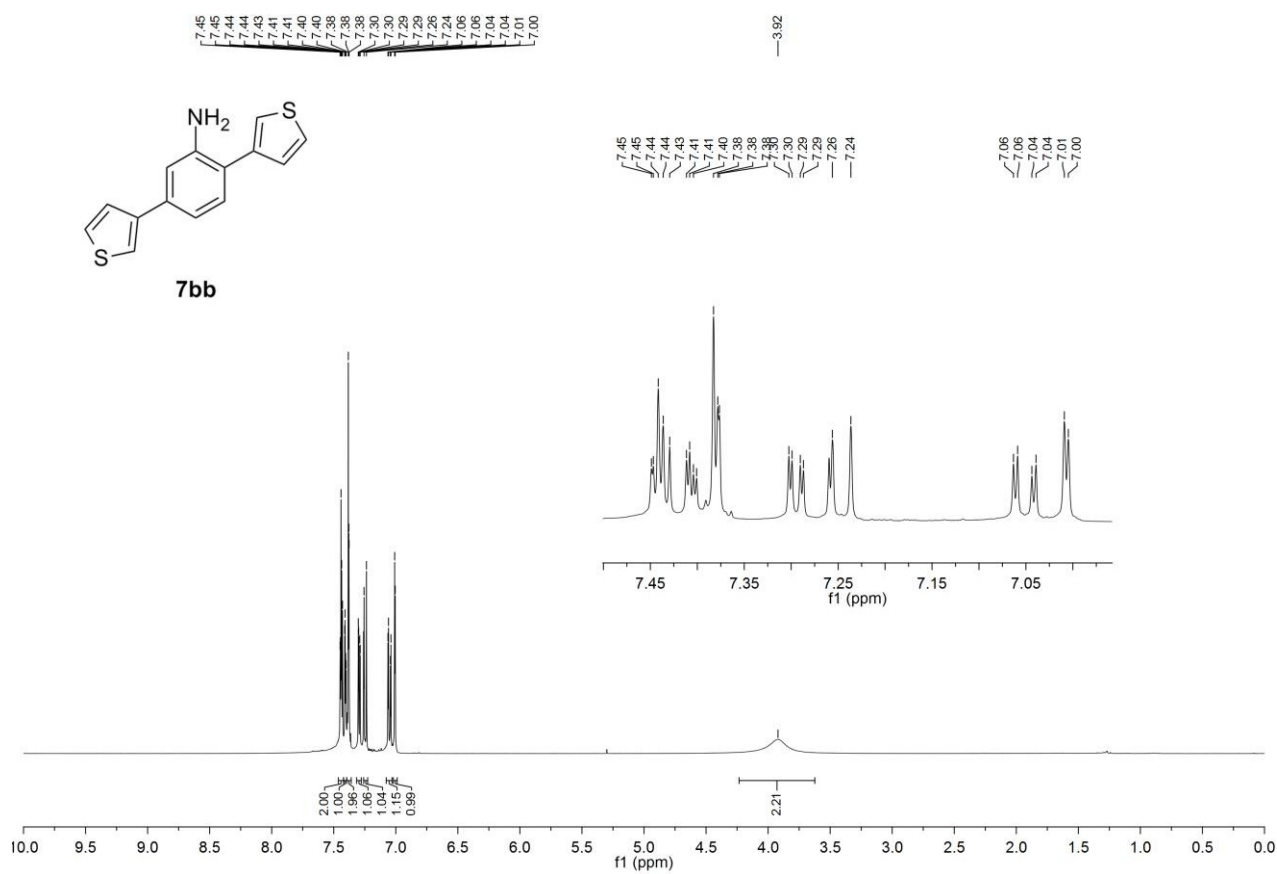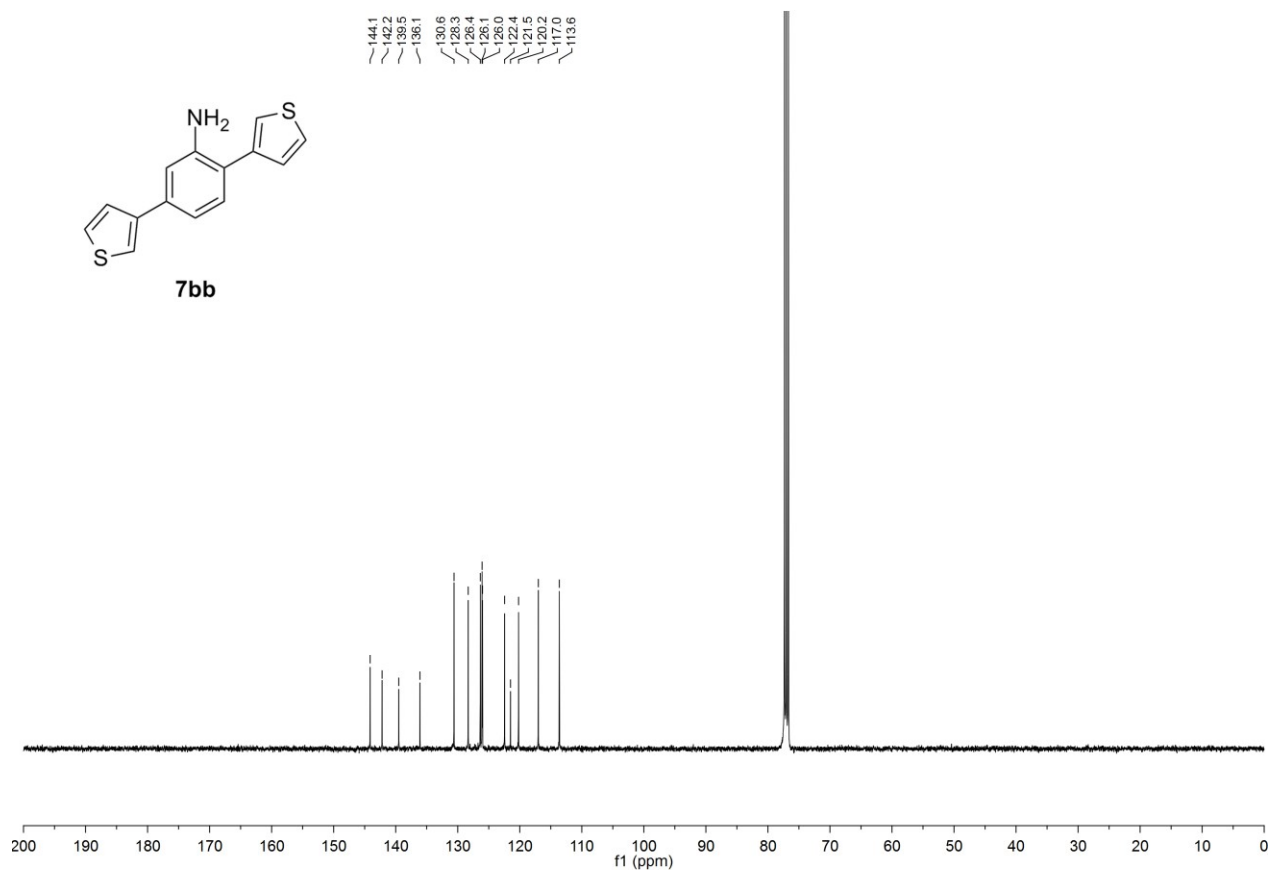



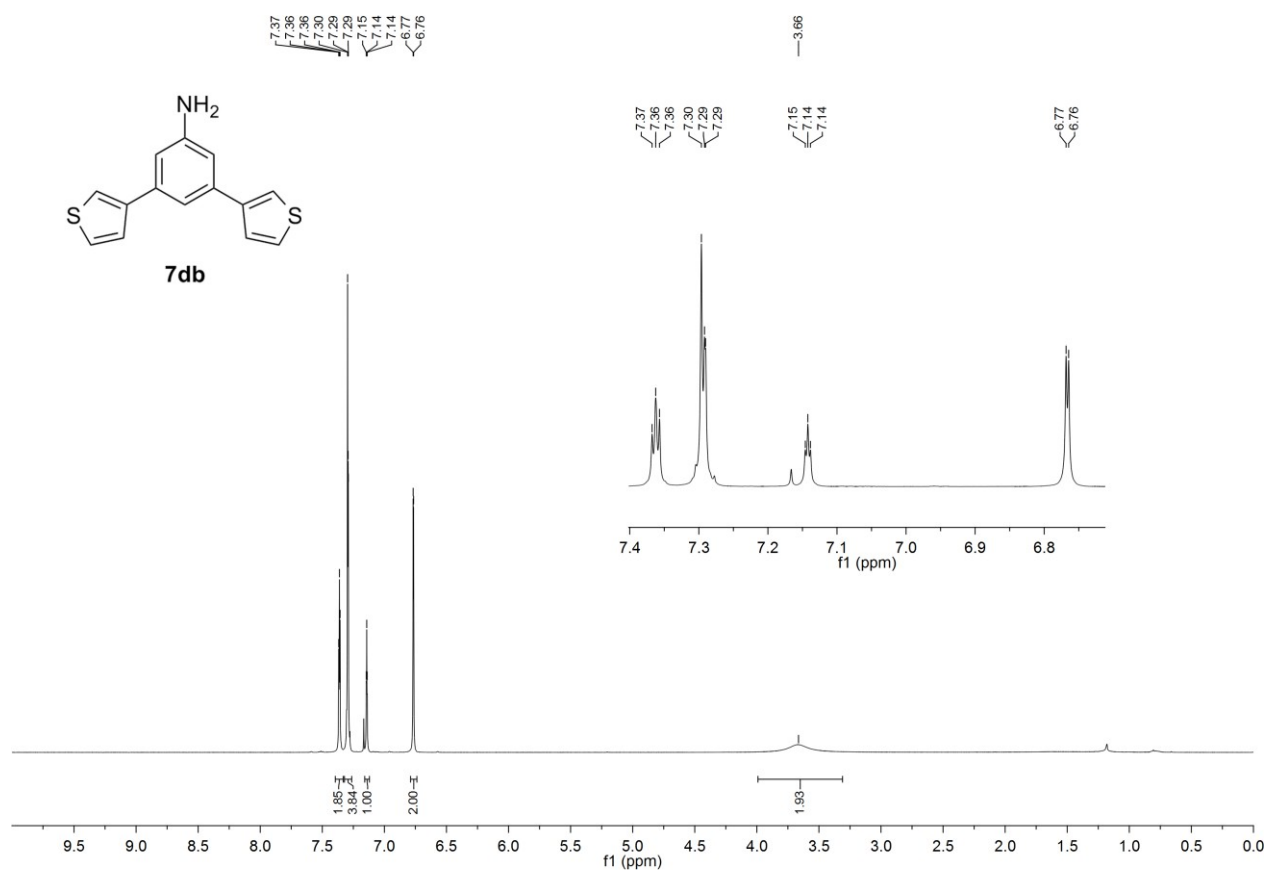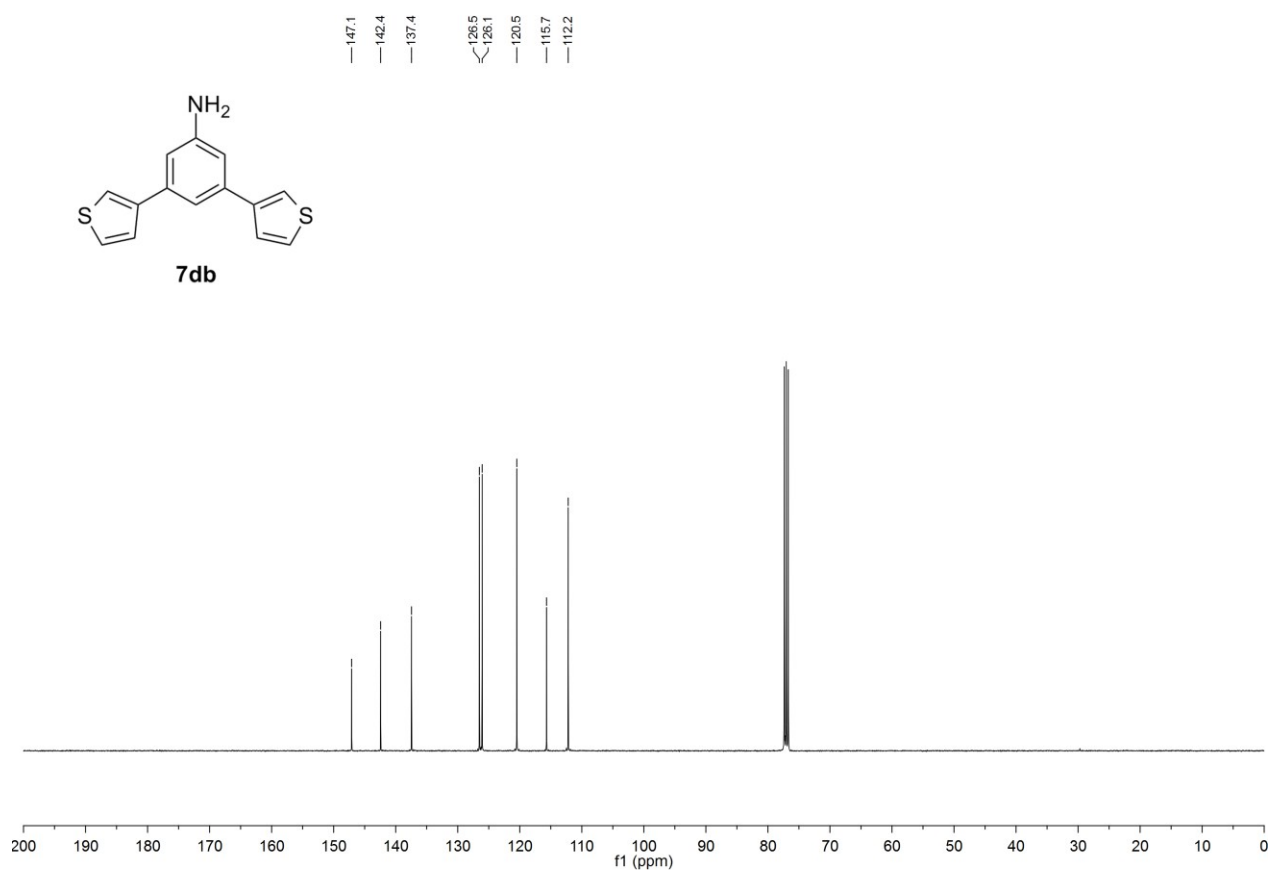

Supplement: s1 [file s1]
